# Supplementary material
Source: PubMed Central journal article supplement (PMC3320167)
Supplement: supp_pp.111.192203_192203ANAPuser_guide.pdf [file supp_pp.111.192203_192203ANAPuser_guide.pdf]

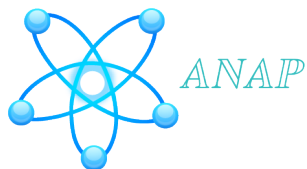

# ANAP User Guide

The ANAP tool has many useful network biology functions that are demonstrated in this user guide.

## 1. The ANAP tool

[http://gmdd.shgmo.org/Computational-Biology/ANAP/ANAP\\_V1.0/](http://gmdd.shgmo.org/Computational-Biology/ANAP/ANAP_V1.0/)

The ANAP tool is very easy to use, and has an intuitive interface. When you open the front webpage, you are presented with a web form in which you load in your AGI codes or Uniprot identifiers, and then select the interaction type source database or detection method. The search button will then search the whole of the ANAP dataset for all the protein interactions from the integration, and the nearest neighbours. The Help link at the top of the ANAP input page links to videos that visually show you how to use the tool. The links between the proteins in the network can be presented in different ways by selecting source database or detection method. This does not affect the network that is generated, but gives information relating to the data that has been used for network construction.

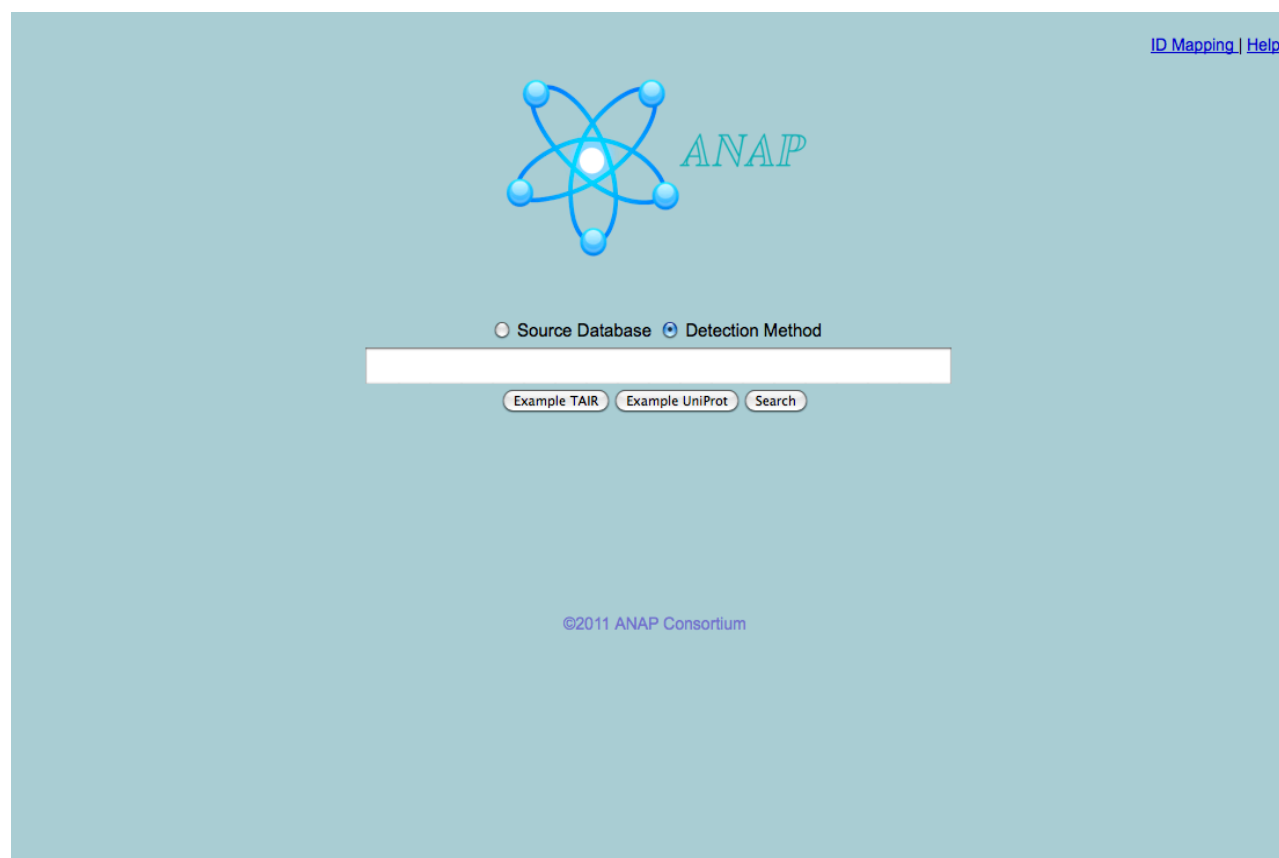

## 2. One identifier search

Try an initial search using one AGI identifier, this will show you how the tool works.

**AT5G62920** - this is an ARR6 Response regulator.

Add this identifier in the box, and click search. You can also add Uniprot codes to the box, ANAP handles both type of identifier.

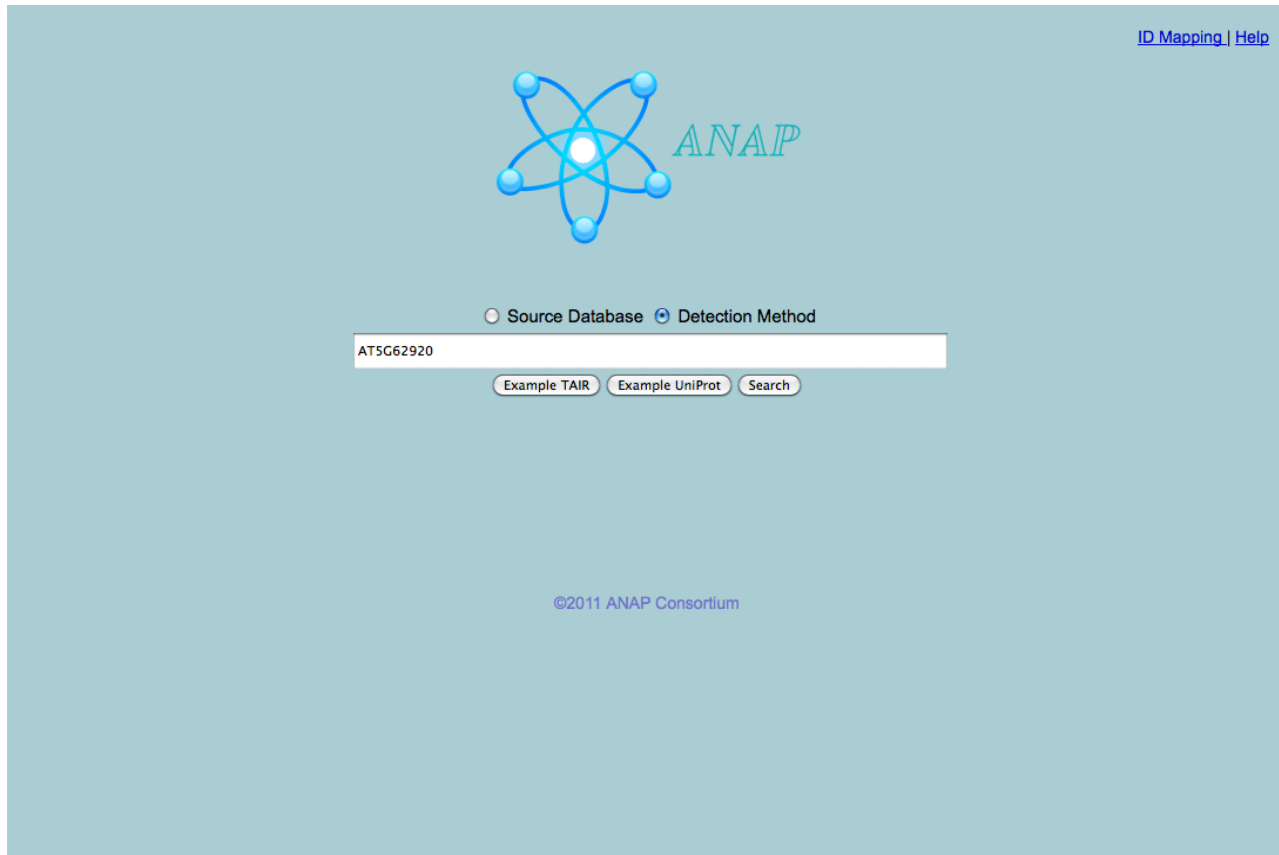

The screenshot displays the ANAP web interface. At the top right, there are links for [ID Mapping](#) and [Help](#). The central logo features a stylized atomic structure with the text "ANAP" to its right. Below the logo, there are two radio buttons: "Source Database" (unselected) and "Detection Method" (selected). A search input field contains the text "AT5G62920". Below the input field are three buttons: "Example TAIR", "Example UniProt", and "Search". At the bottom center, the copyright notice "©2011 ANAP Consortium" is visible.

The resulting network shows the query node highlighted in red, and all the interaction nodes with it in light blue. The multiple edges and colours represent the different interaction methods that prove these set of protein interactions occur. If you hover your mouse over a node, a box will pop up showing you the uniprot and AGI identifiers and a gene description.

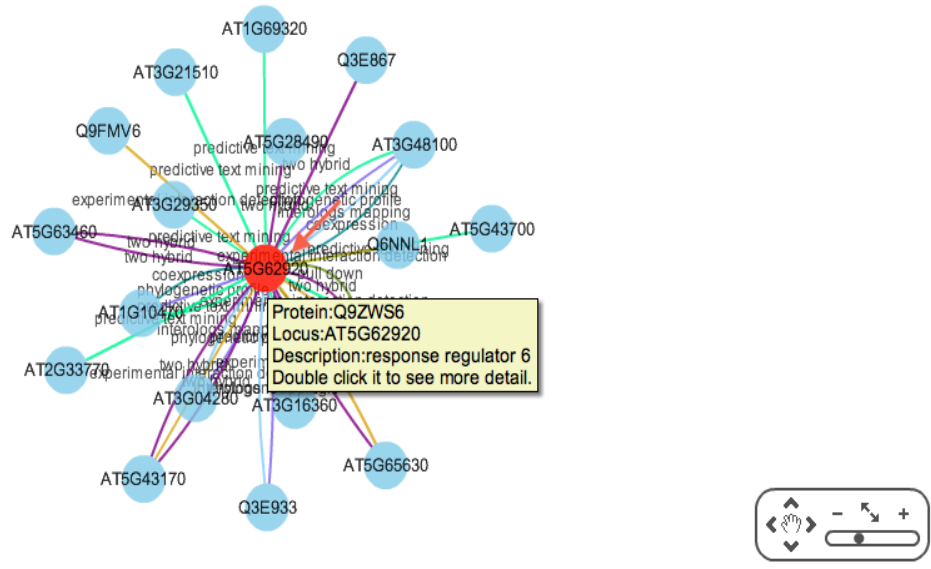

Change the Colour

New ANAP Search Clear Search in Network Clear UP-Regulate Map Clear

The network has 20 nodes and 44 edges!

Home Save Network to PNG PDF SVG SIF GRAPHML XGMML Evidence Source Database Interaction Detection Method Depth Search

ANAP has a set of functions which can be seen at the bottom of the output screen. You can save a network in PDF, PNG, SVG, SIF, GRAPHML and XGMML format. This tool is fully supported by Cytoscape, the widely used network visualisation and analysis tool. The GRAPHML can be imported into other network analysis tools.

You can move the nodes around the page, you have to highlight the nodes you wish to move, and drag them by hovering over a node and dragging. Other functions include a list of the evidence, links to the source database and interaction detection method. There is a depth search function, which allows you to move out 1 nearest neighbour in terms of the protein interaction network.

The resulting network can be increased one nearest neighbour using the depth search function (see below).

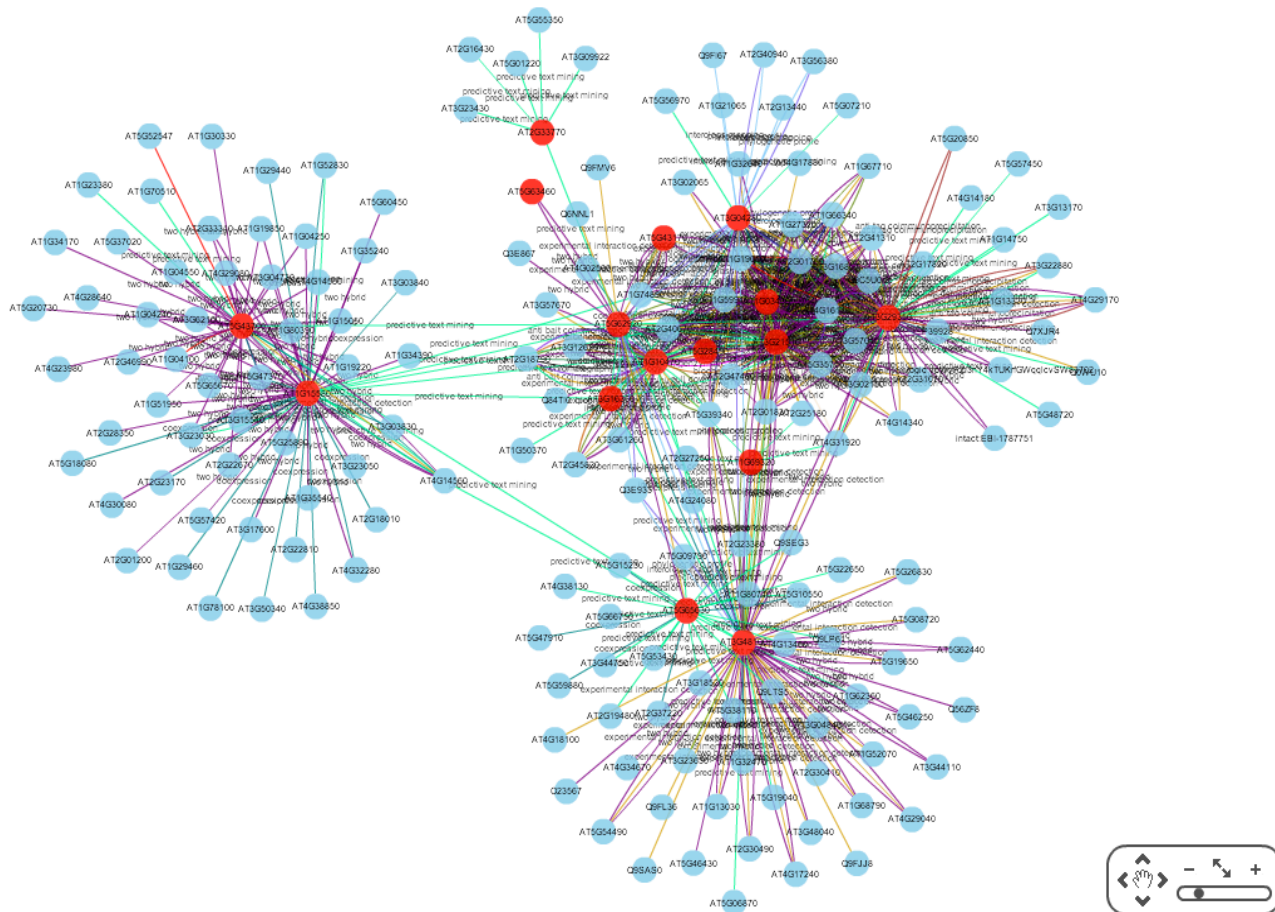

Depth search is defined as the number of paths out from an original node. It can also be named as nearest neighbours, which means the nodes connected to the source node (see below).

paths out from the source node to the target nodes

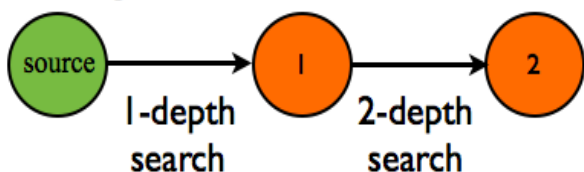

### 3. Analysing a Cytokinin protein interaction network

To show an example network in ANAP, we are using a subset of cytokinin genes, and selecting up-regulated genes from the AtGenExpress microarray experiments as an example of how to analyse protein interaction data using ANAP.

This example gene list contains 24 genes from a Cytokinin signalling pathway (Dortay *et al.* 2006). The following table which is directly from the paper supplementary data, lists those genes and the protein interactions.

| Interacting pair                                                          | Method                                     | References                        |
|---------------------------------------------------------------------------|--------------------------------------------|-----------------------------------|
| ETR1 – AHP1, AHP2, AHP3                                                   | Yeast two-hybrid                           | [1]                               |
| AHK1 – AHP2                                                               | Yeast two-hybrid                           | [1]                               |
| AHK4 – AHP1, AHP2, AHP3, AHP5                                             | <i>E. coli</i> – LacZ                      | [2]; [3]                          |
| AHP1 – ETR1, ARR1, ARR2, ARR3, ARR4, ARR8, ARR9, ARR10                    | Yeast two-hybrid, phospho-relay            | [4]; [1]; [5]; [6]; [7]; [8]      |
| AHP2 – ETR1, AHK1, AHK4, ARR1, ARR2, ARR3, ARR4, ARR8, ARR9, ARR10, ARR11 | Yeast two-hybrid, phospho-relay, quenching | [4]; [3]; [8]; [7]; [9]; [1]; [5] |
| AHP3 – ETR1, AHK4, ARR1, ARR2, ARR8, ARR9, ARR10                          | Yeast two-hybrid, quenching                | [4]; [3]; [7]; [1]; [5]           |
| AHP4 – ARR1, ARR2                                                         | Yeast two-hybrid                           | [5]                               |
| AHP5 – AHK4, ARR1, ARR2, ARR22                                            | Yeast two-hybrid, phospho-relay, quenching | [3]; [5]; [10]                    |
| ARR3 – AHP1, AHP2                                                         | Phospho-relay                              | [6]; [7]                          |
| ARR4 – AHP1, AHP2                                                         | Phospho-relay, yeast two-hybrid            | [6]; [1]; [7]                     |
| ARR8 – AHP1, AHP2, AHP3                                                   | Yeast two-hybrid                           | [1]                               |
| ARR9 – AHP1, AHP2, AHP3                                                   | Yeast two-hybrid                           | [1]                               |
| ARR1 – AHP1, AHP2, AHP3, AHP4, AHP5                                       | Yeast two-hybrid                           | [4]; [5]                          |
| ARR2 – AHP1, AHP2, AHP3, AHP4, AHP5                                       | Yeast two-hybrid                           | [4]; [8]                          |
| ARR10 – AHP1, AHP2, AHP3                                                  | Yeast two-hybrid                           | [4]; [7]                          |
| ARR11 – AHP2                                                              | Phospho-relay                              | [9]                               |
| ARR22 – AHP5                                                              | Phospho-relay                              | [10]                              |

Please highlight the following 23 Cytokinin pathway AGI codes, and add to the ANAP search box.

**AT2G40670 AT1G74890 AT1G19050 AT5G62920 AT3G48100 AT1G10470 AT2G01830  
AT2G41310 AT2G17820 AT3G57040 AT1G59940 AT3G21510 AT4G31920 AT1G27320  
AT1G66340 AT5G39340 AT2G01760 AT3G29350 AT1G67710 AT1G03430 AT5G35750  
AT4G16110 AT3G16857**

[ID Mapping](#) | [Help](#)

ANAP

Source Database  Detection Method

9350 AT3G48100 AT3G57040 AT4G16110 AT4G31920 AT5G35750 AT5G39340 AT5G62920

©2011 ANAP Consortium

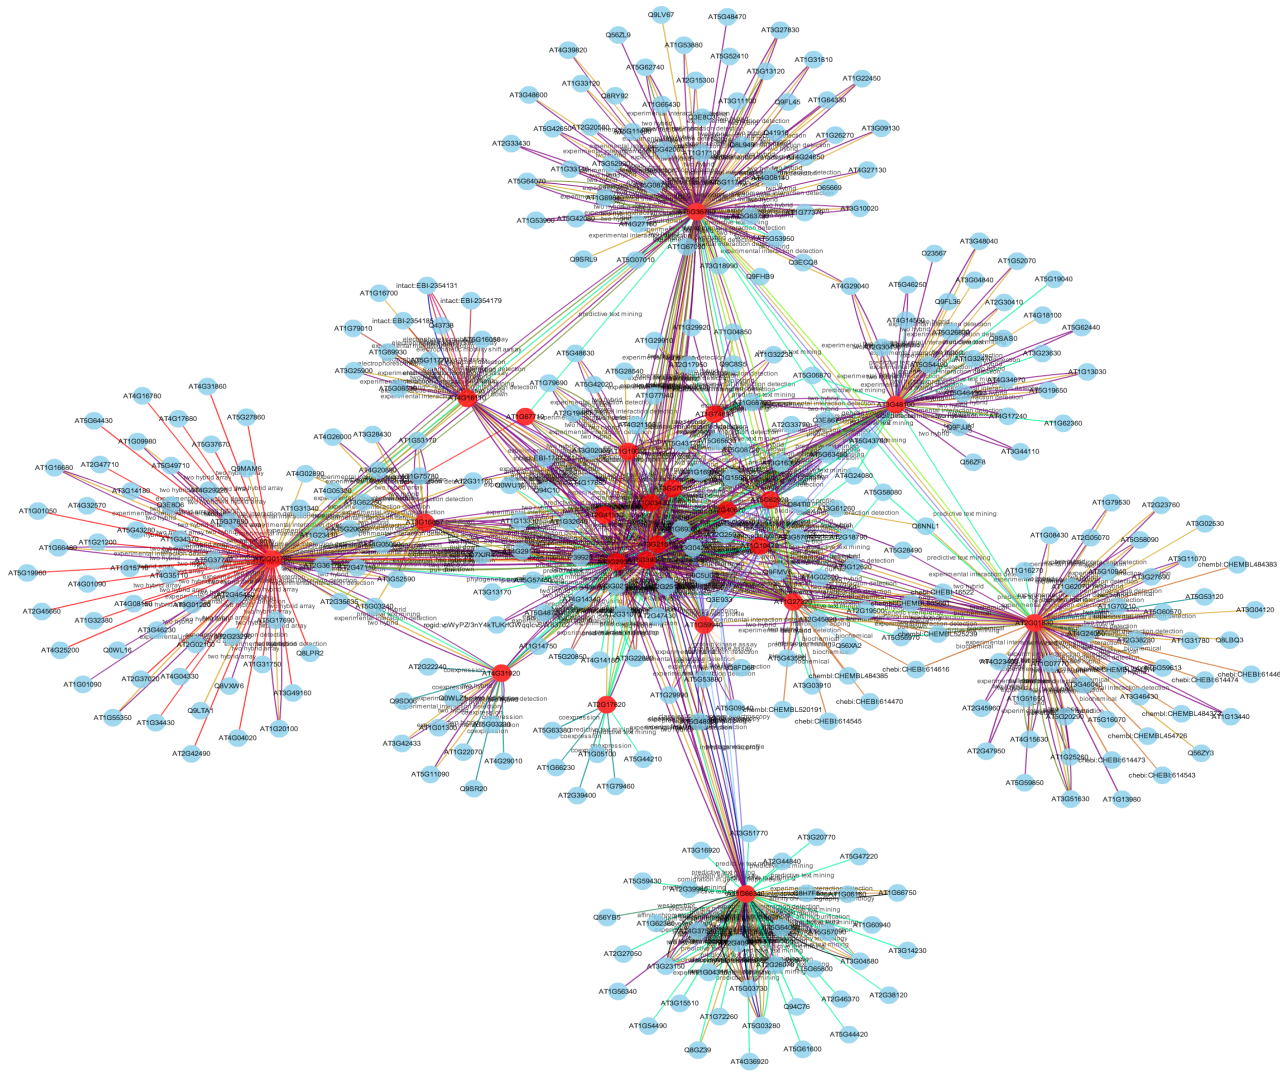



You can zoom into the network (see below) and inspect the various proteins that are identified in the network. The methods that found the interactions are labelled on the edges.

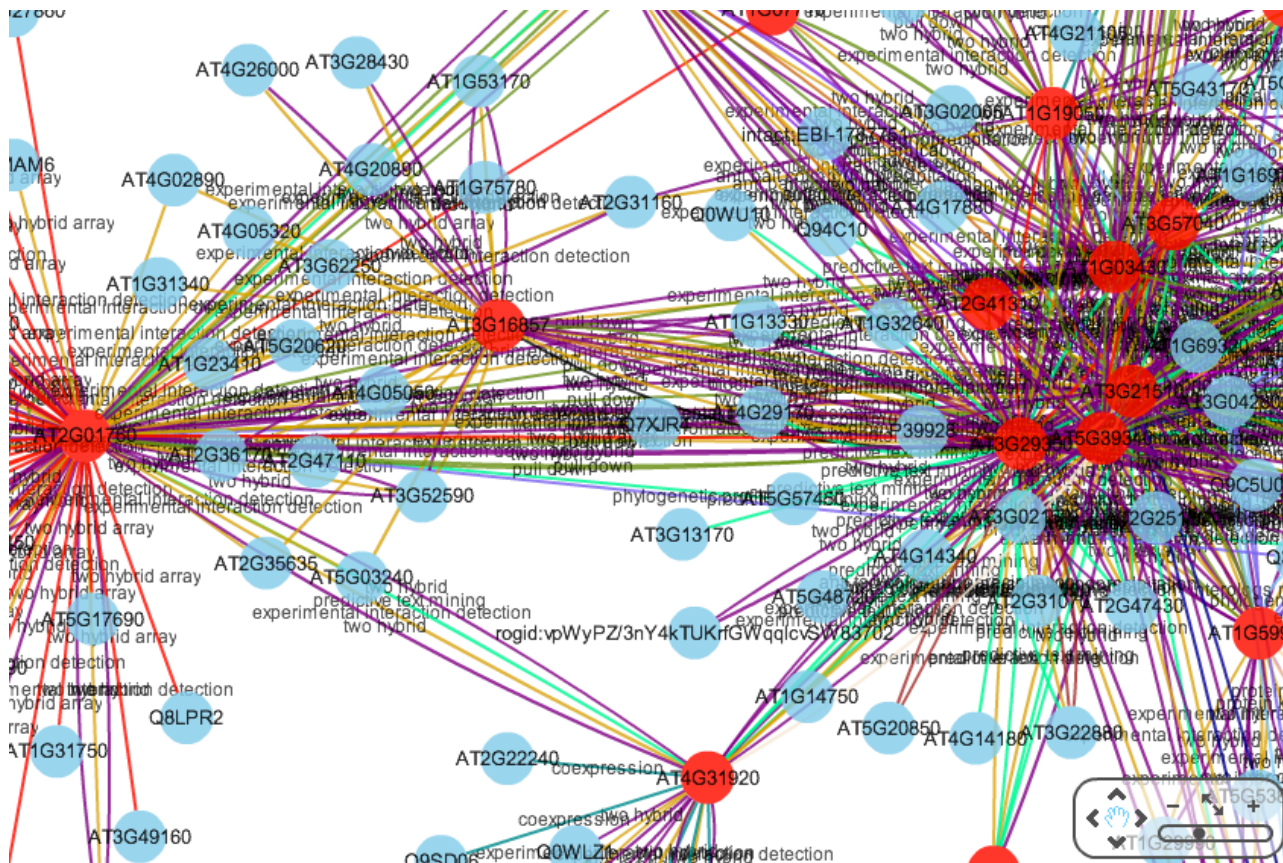

You can map up or down-regulation of the corresponding genes onto the protein interaction network, or a customised list of genes.

You can colour the nodes on the network based on a AGI identifier list, which can be genes of interest to map microarray data.

The following table shows the 24 genes from Dortay *et al.* 2006, the AGI mapping identifiers, the Affy probe identifiers, the microarray log2-fold results and annotation. There were 11 genes (coloured red) out of the 24 genes which were up-regulated 2-fold or more in AtGenExpress Cytokinin treated microarray dataset (Goda *et al.* 2008). There was one down-regulated gene which is highlighted in blue in the table below.

| probe id  | log2-fold   | p-value  | AGI       | Uniprot | Gene name                               |
|-----------|-------------|----------|-----------|---------|-----------------------------------------|
| 266078_at | 3.208401906 | 2.61E-09 | AT2G40670 | Q9SHC2  | ARR16 (response regulator 16)           |
| 262212_at | 3.133437919 | 6.25E-10 | AT1G74890 | Q7G8V2  | ARR15 (RESPONSE REGULATOR 15)           |
| 259466_at | 2.437820275 | 1.82E-09 | AT1G19050 | Q9ZWS7  | ARR7 (RESPONSE REGULATOR 7)             |
| 247406_at | 2.423036628 | 1.47E-09 | AT5G62920 | Q9ZWS6  | ARR6 (RESPONSE REGULATOR 6)             |
| 252374_at | 2.405448208 | 4.89E-09 | AT3G48100 | O80366  | ARR5 (ARABIDOPSIS RESPONSE REGULATOR 5) |
| 263236_at | 1.921933777 | 1.51E-09 | AT1G10470 | O82798  | ARR4 (RESPONSE REGULATOR 4)             |
| 263599_at | 1.888694217 | 5.25E-08 | AT2G01830 | Q9C5U0  | WOL (WOODEN LEG)                        |

|           |                  |             |           |        |                                                            |
|-----------|------------------|-------------|-----------|--------|------------------------------------------------------------|
| 266372_at | 1.415694245      | 1.28E-08    | AT2G41310 | O80365 | ATRR3 (RESPONSE REGULATOR 3)                               |
| 264790_at | 1.324142919      | 1.19E-07    | AT2G17820 | Q9SXL4 | ATHK1 (HISTIDINE KINASE 1)                                 |
| 251665_at | 1.203165362      | 1.86E-07    | AT3G57040 | Q9ZWJ9 | ARR9 (RESPONSE REACTOR 4)                                  |
| 262915_at | 1.132317547      | 6.53E-07    | AT1G59940 | Q9ZWS9 | ARR3 (RESPONSE REGULATOR 3)                                |
| 258184_at | 0.385262241      | 0.001027767 | AT3G21510 | Q9ZNV8 | AHP1 (HISTIDINE-CONTAINING PHOSPHOTRANSMITTER 3)           |
| 253500_at | 0.019787927      | 0.801095111 | AT4G31920 | Q9C5U2 | ARR10 (ARABIDOPSIS RESPONSE REGULATOR 10)                  |
| 264448_at | -<br>0.035530686 | 0.706114366 | AT1G27320 | Q9C5U1 | AHK3 (ARABIDOPSIS HISTIDINE KINASE 3)                      |
| 260133_at | -<br>0.041333474 | 0.614271634 | AT1G66340 | P49333 | ETR1 (ETHYLENE RESPONSE 1)                                 |
| 249473_at | -<br>0.065345712 | 0.386032485 | AT5G39340 | Q9ZWS6 | AHP3/ATHP2 (HISTIDINE-CONTAINING PHOSPHOTRANSMITTER 3)     |
| 265869_at | -<br>0.113195597 | 0.197058747 | AT2G01760 | Q8L9Y3 | ARR14 (ARABIDOPSIS RESPONSE REGULATOR 14)                  |
| 256744_at | -<br>0.167316734 | 0.047145049 | AT3G29350 | Q9SB04 | AHP2 (HISTIDINE-CONTAINING PHOSPHOTRANSMITTER 2)           |
| 245186_at | -0.31796334      | 0.019346406 | AT1G67710 | Q9FXD6 | ARR11 (RESPONSE REGULATOR 11)                              |
| 264838_at | -<br>0.405169888 | 5.64E-05    | AT1G03430 | Q8L9T7 | AHP5 (HISTIDINE-CONTAINING PHOSPHOTRANSFER FACTOR 5)       |
| 249693_at | -<br>0.417876529 | 0.000692231 | AT5G35750 | Q9SAZ5 | AHK2 (ARABIDOPSIS HISTIDINE KINASE 2)                      |
| 245477_at | -<br>0.687547107 | 3.14E-05    | AT4G16110 | O49397 | ARR2 (ARABIDOPSIS RESPONSE REGULATOR 2)                    |
| 257649_at | -<br>0.730396253 | 4.80E-06    | AT3G16857 | Q940D0 | ARR1 (ARABIDOPSIS RESPONSE REGULATOR 1) [2 probes for AGI] |
| 256790_at | -<br>1.261328062 | 7.98E-08    | AT3G16857 | Q940D0 | ARR1 (ARABIDOPSIS RESPONSE REGULATOR 1) [2 probes for AGI] |

Please highlight the following 11 up-regulated genes and add to the 3rd microarray mapping ANAP search box.

**AT2G40670 AT1G74890 AT1G19050 AT5G62920 AT3G48100 AT1G10470 AT2G01830  
AT2G41310 AT2G17820 AT3G57040 AT1G59940**



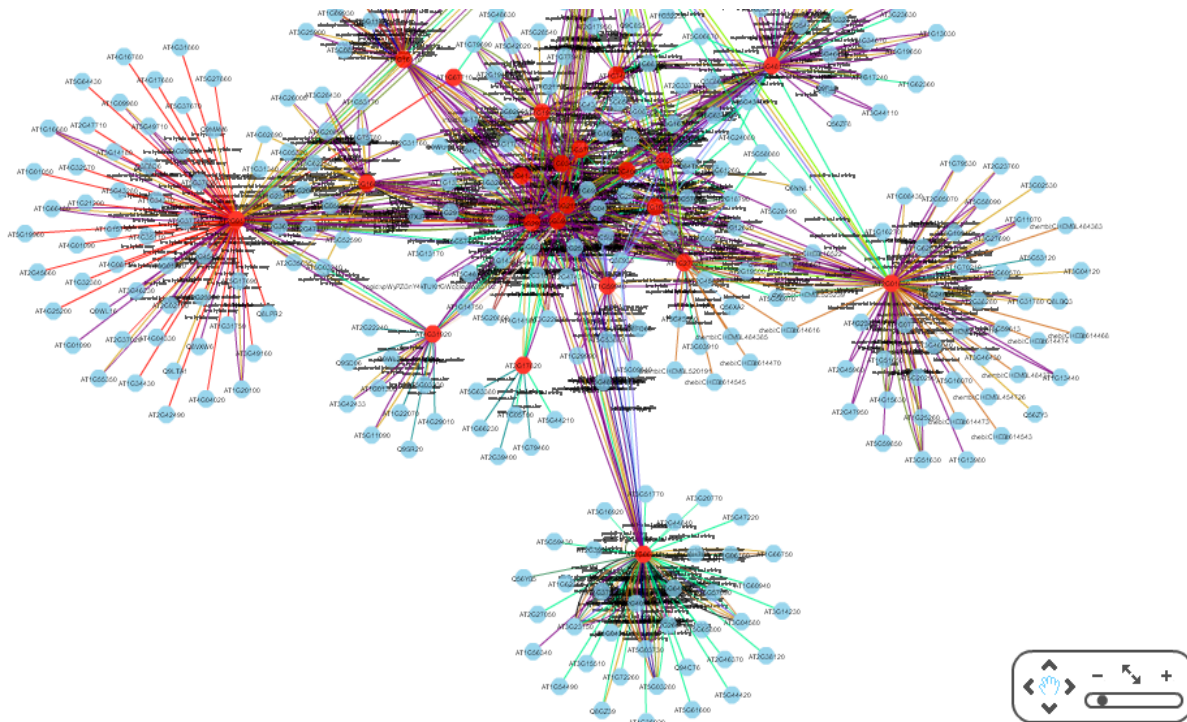

Change the Colour

New ANAP Search

Search in Network

UP-Regulate

**The network has 362 nodes and 1759 edges!**

Home
 Save Network to
 PNG
 PDF
 SVG
 SIF
 GRAPHML
 XGMML

Evidence
 Source Database
 Interaction Detection Method
 Depth Search

The following network shows the 11 up-regulated genes coloured in red and mapped onto the protein interaction network, and you can see they are interlinked with the inner cluster.

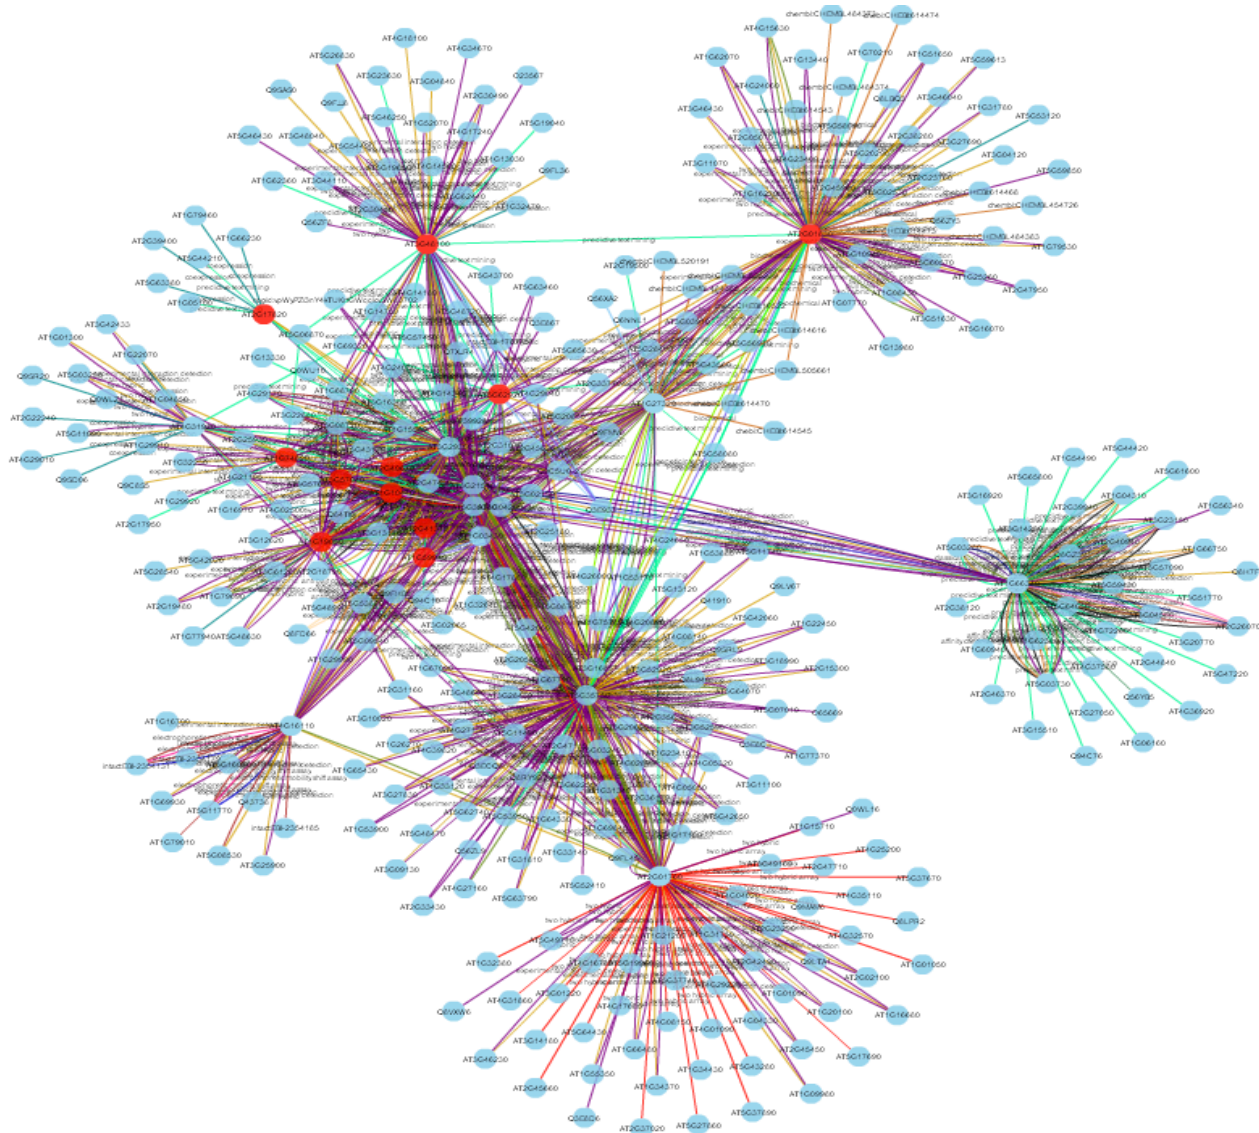

Please highlight the following AGI code, and add to the 2nd search in network ANAP search box.

**AT4G29040**

You can map on proteins that you are interested in, that protein is highlighted in the network as a pink node (see below).

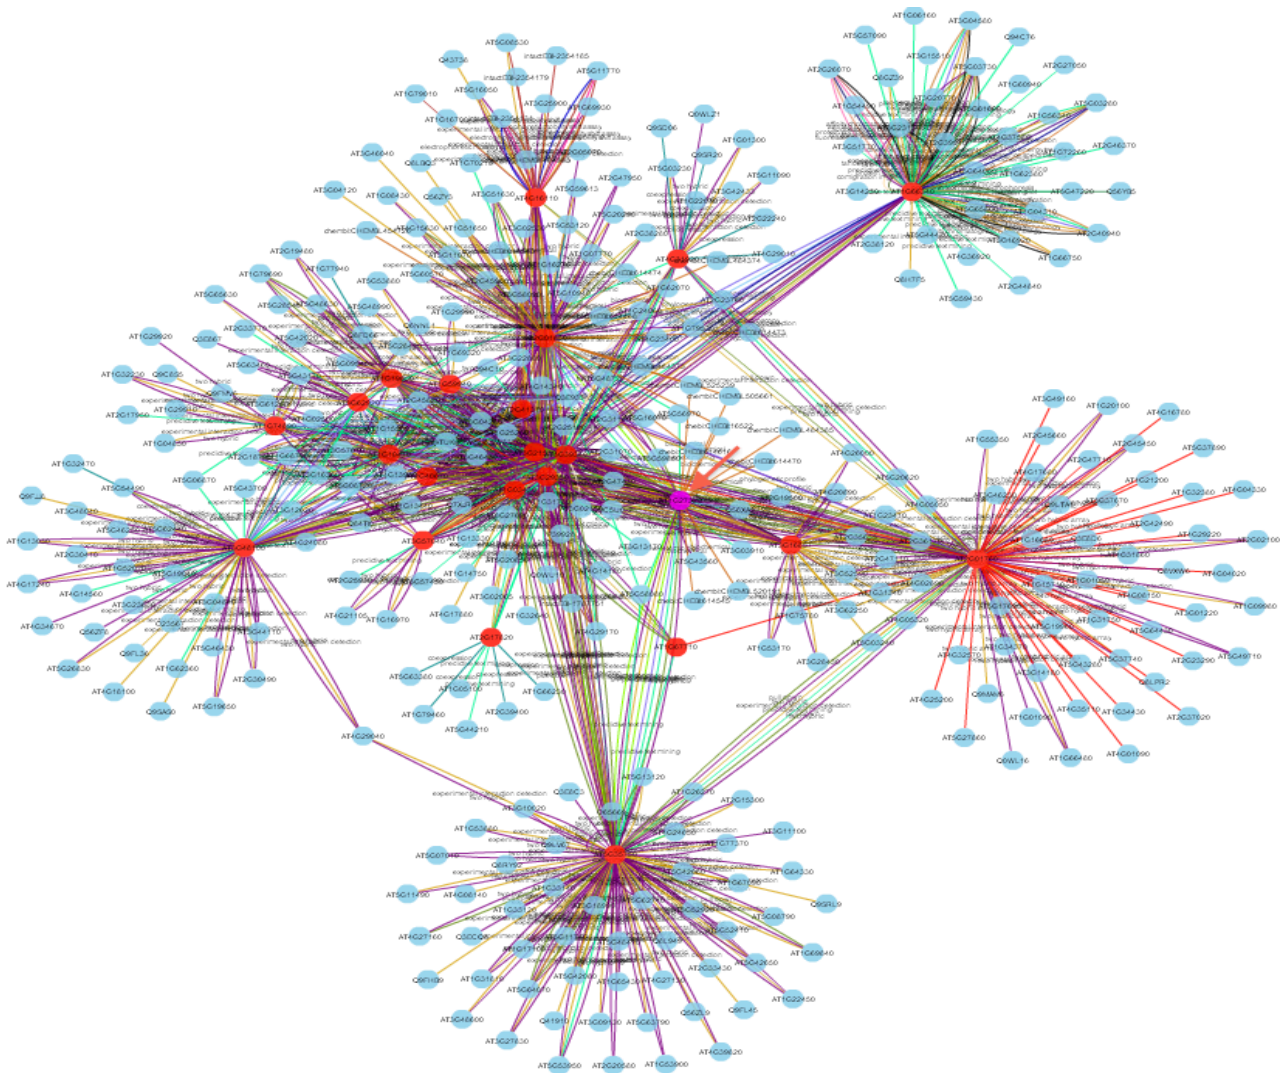

#### 4. More ANAP functions

ANAP has more functions that extend the capability of the tool. One function allows you to see the AGI and Uniprot identifiers in more detail when you click on a node (see below).

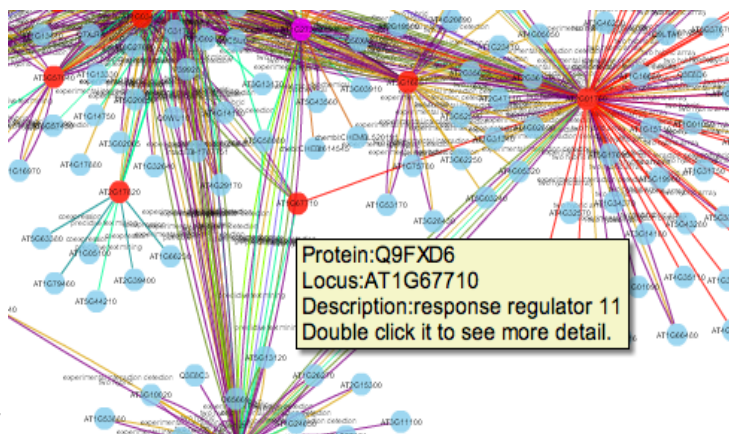

If you click on an edge, you will see the edge type. This is useful for highly interconnected networks with many edges.



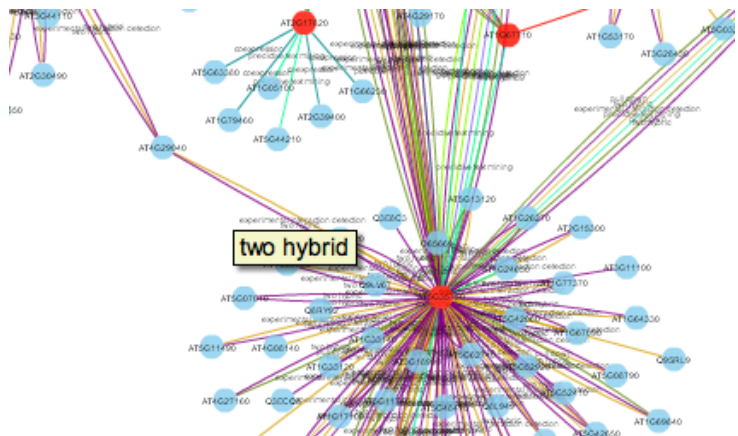

Double click on any node in the network, and the ANAP tool opens the AGI identifier in more detail with the TAIR website (see below).

Gene  Search

Home Help Contact About Us Login/Register

Search Browse Tools Portals Download Submit News ABRC Stocks

**Locus: AT4G29040**

Date last modified: 2011-12-06  
 TAIR Accession: Locus:2119926  
 Representative Gene Model: [AT4G29040.1](#)  
 Gene Model Type: protein\_coding  
 Other names: F19B15.70, F19B15\_70, REGULATORY PARTICLE AAA-ATPASE 2A, RPT2A  
 Description: RPT2a encodes the 26S proteasome subunit. It is required for root meristem maintenance, and regulates gametogenesis.

Map Detail Image

Annotations

| category                        | relationship type                | keyword                                                                                                                                                                                                                                                                                                                                                                                                                                                                                                                                 |
|---------------------------------|----------------------------------|-----------------------------------------------------------------------------------------------------------------------------------------------------------------------------------------------------------------------------------------------------------------------------------------------------------------------------------------------------------------------------------------------------------------------------------------------------------------------------------------------------------------------------------------|
| GO Biological Process           | has protein modification of type | N-terminal protein myristoylation                                                                                                                                                                                                                                                                                                                                                                                                                                                                                                       |
| GO Biological Process           | involved in                      | ATP catabolic process, female gamete generation, lateral root primordium development, leaf morphogenesis, maintenance of root meristem identity, male gamete generation, meristem growth, meristem structural organization, phylome development, proteasomal ubiquitin-dependent protein catabolic process, proteasome assembly, response to cadmium ion, response to heat, response to misfolded protein, root cap development, root development, root morphogenesis, shoot development, ubiquitin-dependent protein catabolic process |
| GO Biological Process           | not involved in                  | proteasome core complex assembly                                                                                                                                                                                                                                                                                                                                                                                                                                                                                                        |
| GO Cellular Component           | is subunit of                    | proteasome complex                                                                                                                                                                                                                                                                                                                                                                                                                                                                                                                      |
| GO Cellular Component           | located in                       | membrane, nucleus, proteasome regulatory particle, base subcomplex                                                                                                                                                                                                                                                                                                                                                                                                                                                                      |
| GO Cellular Component           | not located in                   | cytosol                                                                                                                                                                                                                                                                                                                                                                                                                                                                                                                                 |
| GO Molecular Function           | has                              | ATPase activity                                                                                                                                                                                                                                                                                                                                                                                                                                                                                                                         |
| Growth and Developmental Stages | expressed during                 | 4 anthesis, 4 leaf senescence stage, C globular stage, D bilateral stage, E expanded cotyledon stage, F mature embryo stage, LP:02 two leaves visible, LP:04 four leaves visible, LP:06 six leaves visible, LP:08 eight leaves visible, LP:10 ten leaves visible, LP:12 twelve leaves visible, petal differentiation and expansion stage                                                                                                                                                                                                |
| Plant structure                 | expressed in                     | carpel, cauline leaf, collective leaf structure, cotyledon, cultured plant cell, flower, flower bud, hypocotyl, inflorescence apical meristem, inflorescence meristem, leaf apex, leaf lamina base, megagametophyte, microgametophyte, pedicel, petal, petiole, plant embryo, pollen, quiescent center, root, root initial cell, root meristem, root tip, seed, sepal, shoot apex, shoot apical meristem, shoot system, stamen, stem, vascular leaf                                                                                     |

The menu at the bottom of the page with the ANAP output has several interesting features.

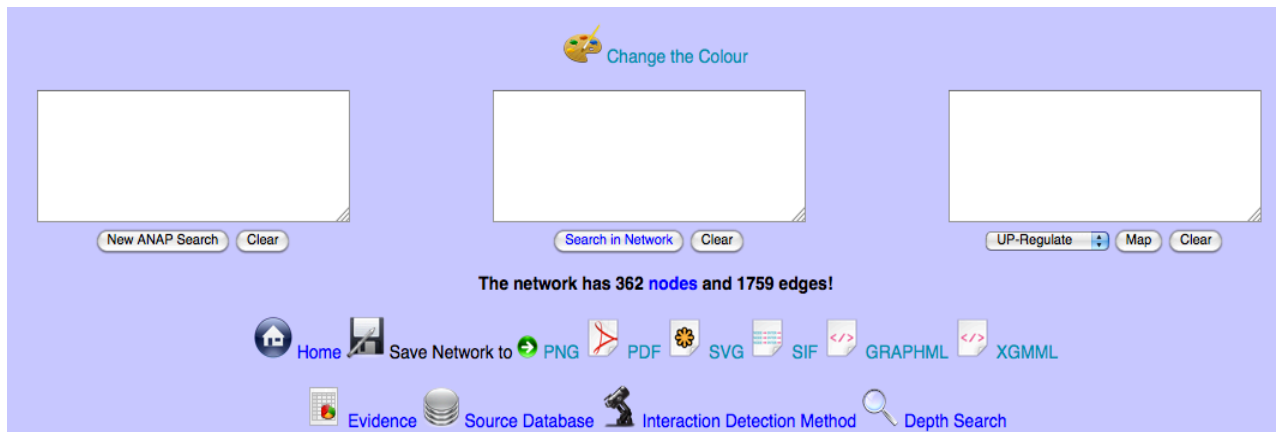

You can save network as a variety of formats, which include PNG, PDF, SVG, SIF, GRAPHML and XGMML format.

There are extra features along the bottom which include evidence, source database, interaction detection method and depth search.

(a) **Evidence** - Clicking on this downloads an excel file with all the information about the interactions in the query network. The figure below shows you the columns, which include the node AGI codes, interaction detection method, species molecule A, species molecule B, pubmed identifier and source database.

Get the Evidence example file -> [here](#) <-

|    | A               | B               | C                               | D                    | E                    | F                 | G               | H |
|----|-----------------|-----------------|---------------------------------|----------------------|----------------------|-------------------|-----------------|---|
| 1  | Name molecule A | Name molecule B | Interaction Detection Method    | Species molecule A   | Species molecule B   | PubMed Identifier | Source Database |   |
| 2  | AT1G01300       | AT4G31920       | experimental interaction detect | Arabidopsis thaliana | Arabidopsis thaliana | pubmed:18642946   | STRING          |   |
| 3  | AT1G03430       | AT1G10470       | experimental interaction detect | Arabidopsis thaliana | Arabidopsis thaliana | pubmed:16965536   | STRING          |   |
| 4  | AT1G03430       | AT1G10470       | pull down                       | Arabidopsis thaliana | Arabidopsis thaliana | pubmed:16965536   | iRefIndex       |   |
| 5  | AT1G03430       | AT1G10470       | two hybrid                      | Arabidopsis thaliana | Arabidopsis thaliana | pubmed:16965536   | APID            |   |
| 6  | AT1G03430       | AT1G10470       | two hybrid                      | Arabidopsis thaliana | Arabidopsis thaliana | pubmed:16965536   | iRefIndex       |   |
| 7  | AT1G03430       | AT1G10470       | two hybrid                      | Arabidopsis thaliana | Arabidopsis thaliana | pubmed:18642946   | APID            |   |
| 8  | AT1G03430       | AT1G10470       | two hybrid                      | Arabidopsis thaliana | Arabidopsis thaliana | pubmed:18642946   | BioGrid         |   |
| 9  | AT1G03430       | AT1G10470       | two hybrid                      | Arabidopsis thaliana | Arabidopsis thaliana | pubmed:18642946   | IntAct          |   |
| 10 | AT1G03430       | AT1G10470       | two hybrid                      | Arabidopsis thaliana | Arabidopsis thaliana | pubmed:18642946   | iRefIndex       |   |
| 11 | AT1G03430       | AT1G19050       | experimental interaction detect | Arabidopsis thaliana | Arabidopsis thaliana | pubmed:16965536   | STRING          |   |
| 12 | AT1G03430       | AT1G19050       | pull down                       | Arabidopsis thaliana | Arabidopsis thaliana | pubmed:16965536   | iRefIndex       |   |
| 13 | AT1G03430       | AT1G19050       | two hybrid                      | Arabidopsis thaliana | Arabidopsis thaliana | pubmed:16965536   | IntAct          |   |
| 14 | AT1G03430       | AT1G19050       | two hybrid                      | Arabidopsis thaliana | Arabidopsis thaliana | pubmed:16965536   | iRefIndex       |   |
| 15 | AT1G03430       | AT1G27320       | experimental interaction detect | Arabidopsis thaliana | Arabidopsis thaliana | pubmed:16965536   | STRING          |   |
| 16 | AT1G03430       | AT1G27320       | pull down                       | Arabidopsis thaliana | Arabidopsis thaliana | pubmed:16965536   | IntAct          |   |
| 17 | AT1G03430       | AT1G27320       | two hybrid                      | Arabidopsis thaliana | Arabidopsis thaliana | pubmed:16965536   | IntAct          |   |
| 18 | AT1G03430       | AT1G27320       | two hybrid                      | Arabidopsis thaliana | Arabidopsis thaliana | pubmed:16965536   | iRefIndex       |   |
| 19 | AT1G03430       | AT1G32640       | experimental interaction detect | Arabidopsis thaliana | Arabidopsis thaliana | pubmed:12826627   | STRING          |   |
| 20 | AT1G03430       | AT1G32640       | two hybrid                      | Arabidopsis thaliana | Arabidopsis thaliana | pubmed:12826627   | APID            |   |
| 21 | AT1G03430       | AT1G32640       | two hybrid                      | Arabidopsis thaliana | Arabidopsis thaliana | pubmed:12826627   | BIND            |   |
| 22 | AT1G03430       | AT1G32640       | two hybrid                      | Arabidopsis thaliana | Arabidopsis thaliana | pubmed:12826627   | BioGrid         |   |
| 23 | AT1G03430       | AT1G32640       | two hybrid                      | Arabidopsis thaliana | Arabidopsis thaliana | pubmed:12826627   | iRefIndex       |   |
| 24 | AT1G03430       | AT1G59940       | experimental interaction detect | Arabidopsis thaliana | Arabidopsis thaliana | pubmed:16965536   | STRING          |   |
| 25 | AT1G03430       | AT1G59940       | pull down                       | Arabidopsis thaliana | Arabidopsis thaliana | pubmed:16965536   | iRefIndex       |   |
| 26 | AT1G03430       | AT1G59940       | two hybrid                      | Arabidopsis thaliana | Arabidopsis thaliana | pubmed:16965536   | APID            |   |
| 27 | AT1G03430       | AT1G59940       | two hybrid                      | Arabidopsis thaliana | Arabidopsis thaliana | pubmed:16965536   | iRefIndex       |   |
| 28 | AT1G03430       | AT1G67710       | experimental interaction detect | Arabidopsis thaliana | Arabidopsis thaliana | pubmed:16965536   | STRING          |   |
| 29 | AT1G03430       | AT1G67710       | pull down                       | Arabidopsis thaliana | Arabidopsis thaliana | pubmed:16965536   | iRefIndex       |   |
| 30 | AT1G03430       | AT1G67710       | two hybrid                      | Arabidopsis thaliana | Arabidopsis thaliana | pubmed:16965536   | APID            |   |
| 31 | AT1G03430       | AT1G67710       | two hybrid                      | Arabidopsis thaliana | Arabidopsis thaliana | pubmed:16965536   | iRefIndex       |   |
| 32 | AT1G03430       | AT1G74890       | experimental interaction detect | Arabidopsis thaliana | Arabidopsis thaliana | pubmed:16965536   | STRING          |   |
| 33 | AT1G03430       | AT1G74890       | pull down                       | Arabidopsis thaliana | Arabidopsis thaliana | pubmed:16965536   | IntAct          |   |
| 34 | AT1G03430       | AT1G74890       | pull down                       | Arabidopsis thaliana | Arabidopsis thaliana | pubmed:16965536   | iRefIndex       |   |
| 35 | AT1G03430       | AT1G74890       | two hybrid                      | Arabidopsis thaliana | Arabidopsis thaliana | pubmed:16965536   | IntAct          |   |
| 36 | AT1G03430       | AT1G74890       | two hybrid                      | Arabidopsis thaliana | Arabidopsis thaliana | pubmed:16965536   | iRefIndex       |   |
| 37 | AT1G03430       | AT2G01760       | experimental interaction detect | Arabidopsis thaliana | Arabidopsis thaliana | pubmed:16965536   | STRING          |   |
| 38 | AT1G03430       | AT2G01760       | pull down                       | Arabidopsis thaliana | Arabidopsis thaliana | pubmed:16965536   | IntAct          |   |
| 39 | AT1G03430       | AT2G01760       | two hybrid                      | Arabidopsis thaliana | Arabidopsis thaliana | pubmed:16965536   | IntAct          |   |
| 40 | AT1G03430       | AT2G01830       | experimental interaction detect | Arabidopsis thaliana | Arabidopsis thaliana | pubmed:16965536   | STRING          |   |
| 41 | AT1G03430       | AT2G01830       | two hybrid                      | Arabidopsis thaliana | Arabidopsis thaliana | pubmed:16965536   | APID            |   |
| 42 | AT1G03430       | AT2G01830       | two hybrid                      | Arabidopsis thaliana | Arabidopsis thaliana | pubmed:16965536   | IntAct          |   |
| 43 | AT1G03430       | AT2G25180       | experimental interaction detect | Arabidopsis thaliana | Arabidopsis thaliana | pubmed:11158442   | STRING          |   |
| 44 | AT1G03430       | AT2G40670       | experimental interaction detect | Arabidopsis thaliana | Arabidopsis thaliana | pubmed:16965536   | STRING          |   |
| 45 | AT1G03430       | AT2G40670       | pull down                       | Arabidopsis thaliana | Arabidopsis thaliana | pubmed:16965536   | iRefIndex       |   |
| 46 | AT1G03430       | AT2G40670       | two hybrid                      | Arabidopsis thaliana | Arabidopsis thaliana | pubmed:16965536   | IntAct          |   |
| 47 | AT1G03430       | AT2G40670       | two hybrid                      | Arabidopsis thaliana | Arabidopsis thaliana | pubmed:16965536   | iRefIndex       |   |

(b) **Source database** - Clicking on this opens a new webpage which shows the source database that contained the interaction.



```

AT1G01300    STRING    AT4G31920
AT1G03430    STRING    AT1G10470
AT1G03430    iRefIndex AT1G10470
AT1G03430    APID      AT1G10470
AT1G03430    iRefIndex AT1G10470
AT1G03430    APID      AT1G10470
AT1G03430    BioGrid   AT1G10470
AT1G03430    IntAct    AT1G10470
AT1G03430    iRefIndex AT1G10470
AT1G03430    STRING    AT1G19050
AT1G03430    iRefIndex AT1G19050
AT1G03430    IntAct    AT1G19050
AT1G03430    iRefIndex AT1G19050
AT1G03430    STRING    AT1G27320
AT1G03430    IntAct    AT1G27320
AT1G03430    IntAct    AT1G27320
AT1G03430    iRefIndex AT1G27320
AT1G03430    STRING    AT1G32640
AT1G03430    APID      AT1G32640
AT1G03430    BIND      AT1G32640
AT1G03430    BioGrid   AT1G32640
AT1G03430    iRefIndex AT1G32640
AT1G03430    STRING    AT1G59940
AT1G03430    iRefIndex AT1G59940
AT1G03430    APID      AT1G59940
AT1G03430    iRefIndex AT1G59940
AT1G03430    STRING    AT1G67710
AT1G03430    iRefIndex AT1G67710
AT1G03430    APID      AT1G67710
AT1G03430    iRefIndex AT1G67710
AT1G03430    STRING    AT1G74890
AT1G03430    IntAct    AT1G74890
AT1G03430    iRefIndex AT1G74890
    
```

(c) **Interaction detection method** - Clicking on this opens a new webpage which shows the different interaction methods. For example, 2 hybrid, affinity chromatography technology, etc.

```

AT1G01300    experimental interaction detection    AT4G31920
AT1G03430    experimental interaction detection    AT1G10470
AT1G03430    pull down    AT1G10470
AT1G03430    two hybrid   AT1G10470
AT1G03430    experimental interaction detection    AT1G19050
AT1G03430    pull down    AT1G19050
AT1G03430    two hybrid   AT1G19050
AT1G03430    two hybrid   AT1G19050
AT1G03430    experimental interaction detection    AT1G27320
AT1G03430    pull down    AT1G27320
AT1G03430    two hybrid   AT1G27320
AT1G03430    two hybrid   AT1G27320
AT1G03430    experimental interaction detection    AT1G32640
AT1G03430    two hybrid   AT1G32640
AT1G03430    two hybrid   AT1G32640
AT1G03430    two hybrid   AT1G32640
AT1G03430    experimental interaction detection    AT1G59940
AT1G03430    pull down    AT1G59940
AT1G03430    two hybrid   AT1G59940
AT1G03430    experimental interaction detection    AT1G67710
AT1G03430    pull down    AT1G67710
AT1G03430    two hybrid   AT1G67710
AT1G03430    two hybrid   AT1G67710
AT1G03430    experimental interaction detection    AT1G74890
AT1G03430    pull down    AT1G74890
AT1G03430    two hybrid   AT1G74890
AT1G03430    two hybrid   AT1G74890
AT1G03430    experimental interaction detection    AT2G01760
    
```

## 5. Links to other databases

If you right click on any node, a window will pop with links to several databases including AtGenExpress, 1001 genomes browser, UniProt, KEGG and Ensembl Genome browsers. There is also the function to select first nearest neighbour to that node.

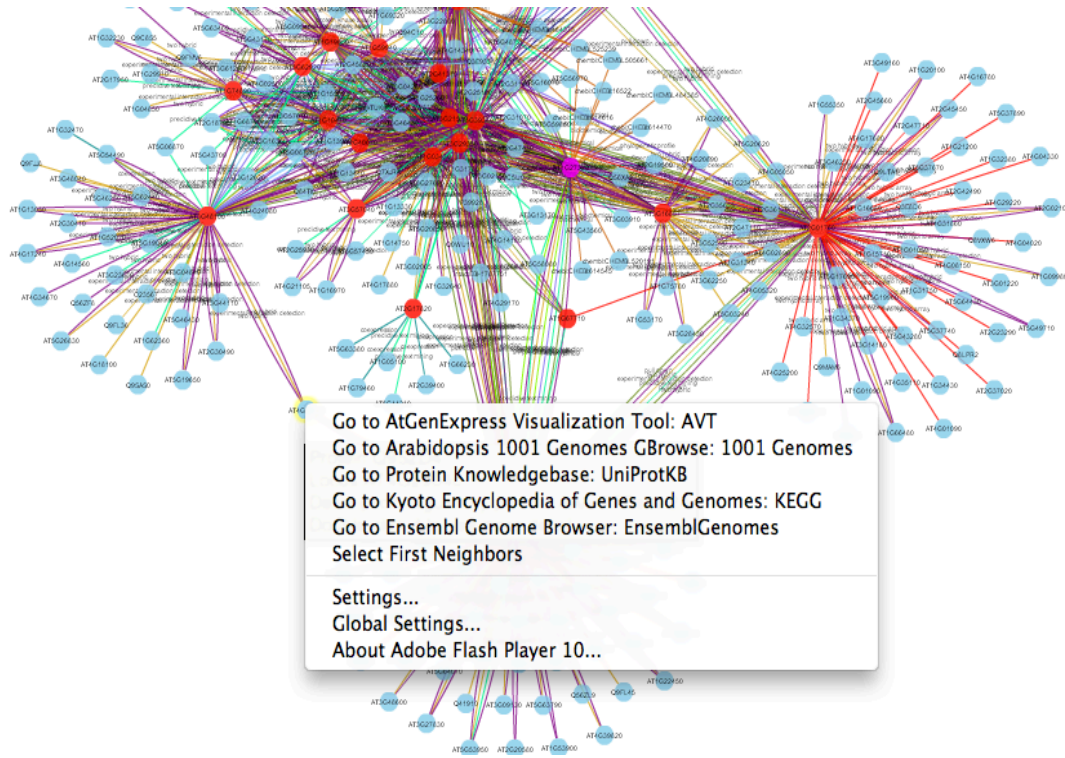

(a) Link to AtGenExpress

AtGenExpress Visualization Tool (AVT)

Select experiment: AtGE Development

Select normalization: Absolute values  only create tab-delimited file

Select genes:  Run Clear

enter desired AGI or Affymetrix identifiers (comma separated), e.g., AT5G61850, AT5G57090, At1G29910, 254595\_at then press "Run"

AtGenExpress Development

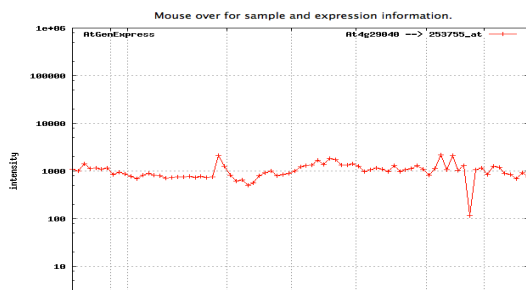

(b) Link to Arabidopsis 1001 Genomes GBrowse

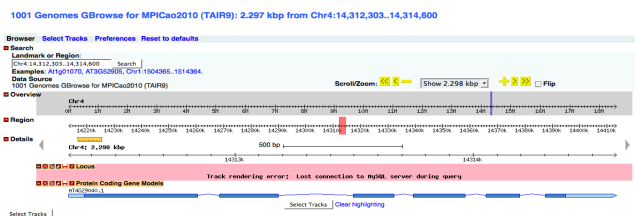

(c) Link to UniProt database

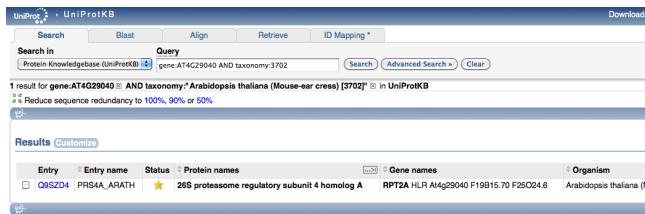

(d) Link to KEGG

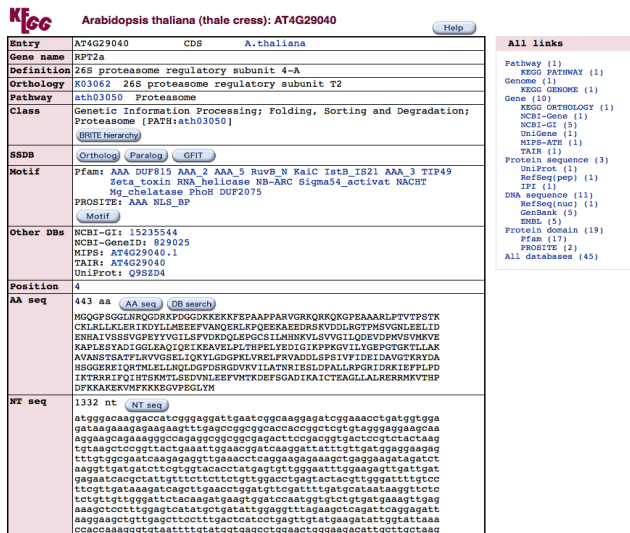

(e) Link to Ensembl Genome Browser

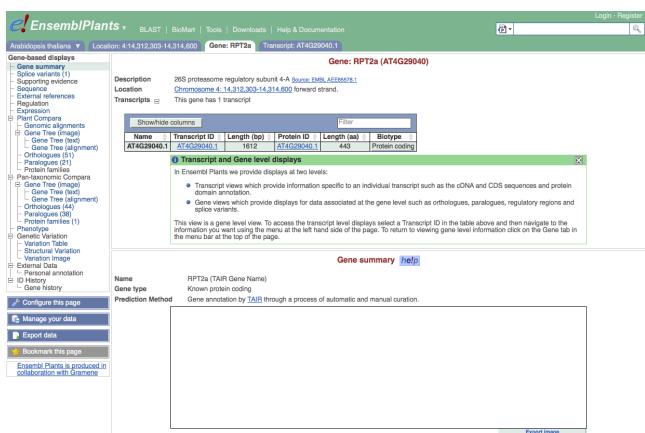

## 6. Importing the ANAP Cytokinin protein interaction network into Cytoscape

Cytoscape is the main network visualisation and analysis software tool (Cline *et al.* 2009) that is fully supported by ANAP, so results can be saved in a format and imported into Cytoscape. Cytoscape is useful when analysing very large networks since internet browsers have problems displaying very large networks and there are also many supporting analysis plugins.

First download Cytoscape from the following website:-

<http://www.cytoscape.org/>

Install Cytoscape onto your computer.

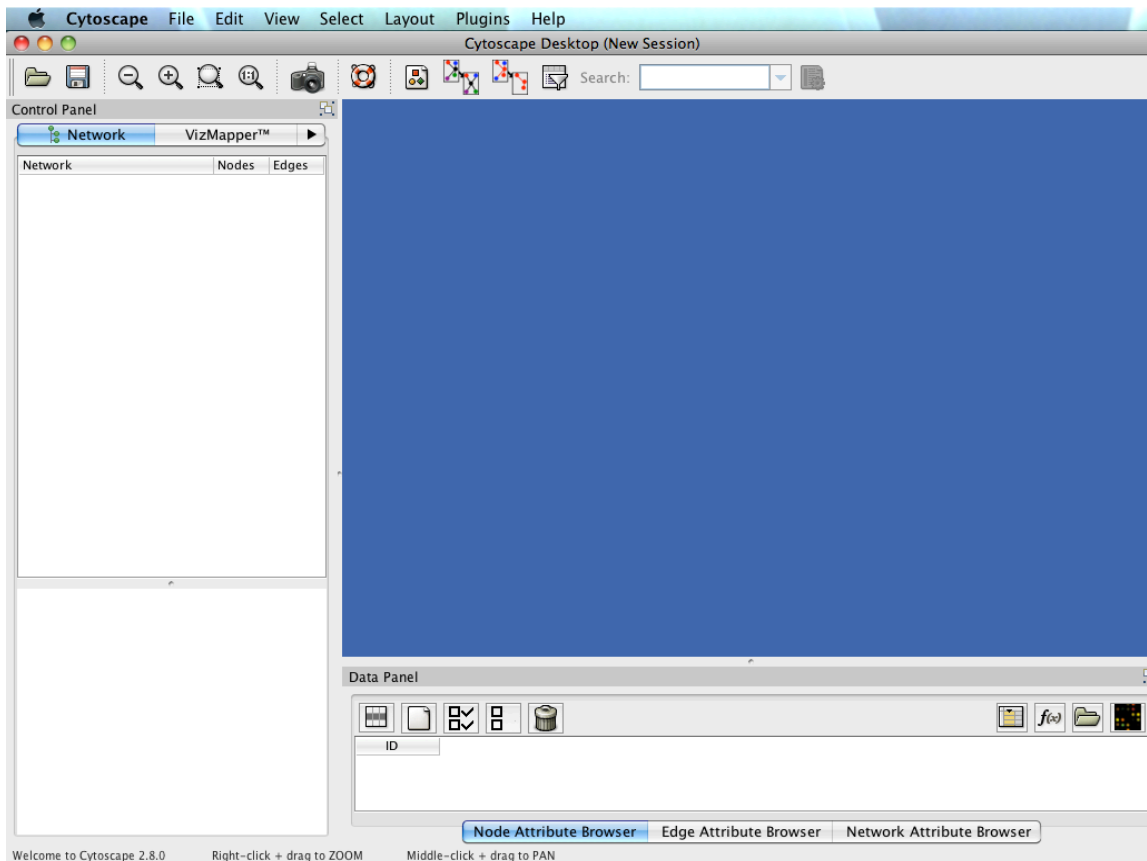

Please use the XGMML file from using this user guide, or download it -> [here](#) <-

Import the ANAP generated XGMML file into Cytoscape (see below).

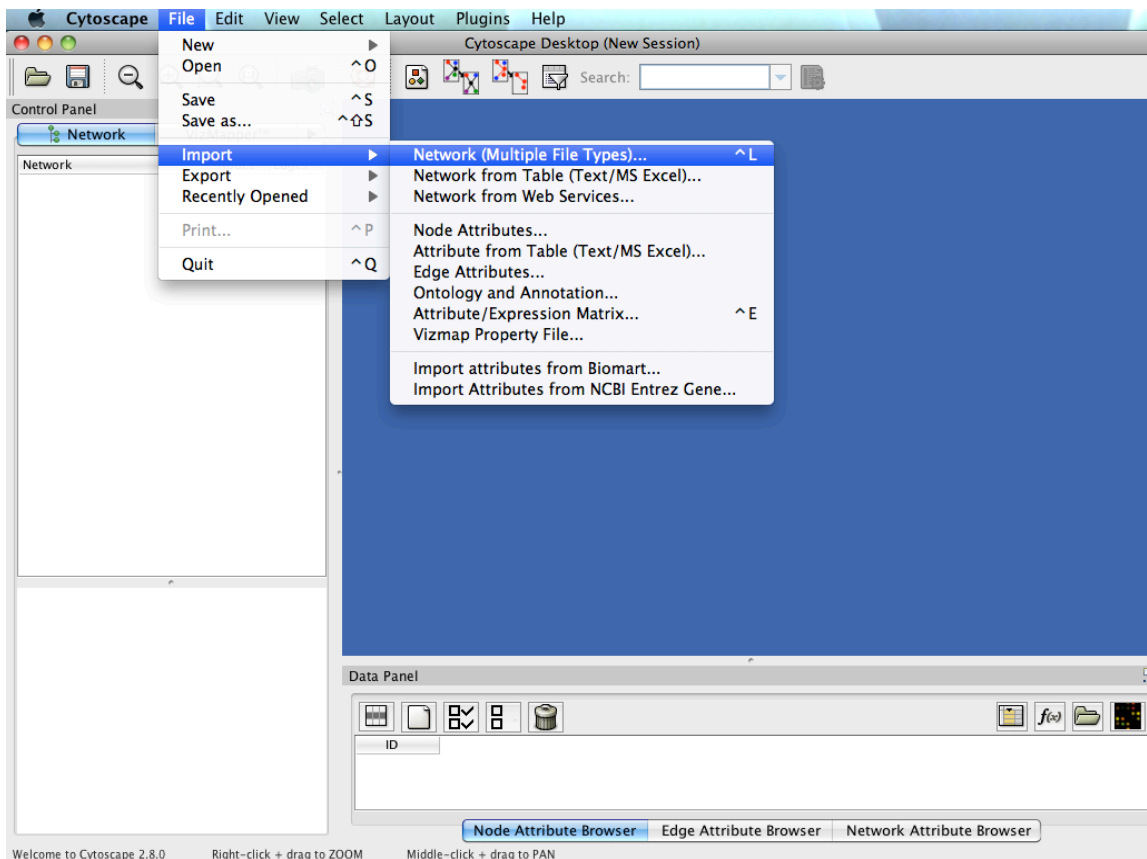

The imported network retains the node and edge colouring of ANAP using the XGMML file (see below).

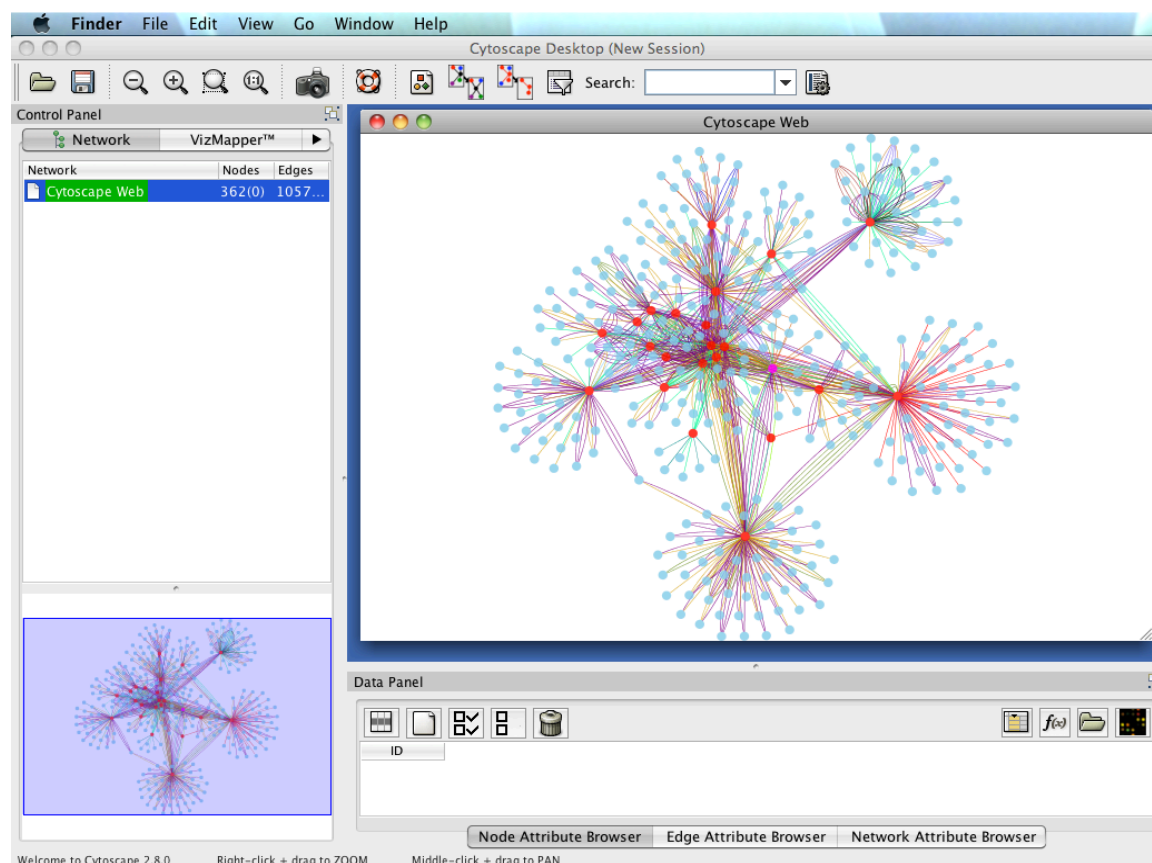

Cytoscape has many interesting features which complement the ANAP tool, these include expression data mapping, being able to render very large networks, and a wide variety of analysis functions.

You can create a node attributes file easily in a text editor, which will map the AGI codes to protein identifiers.

The ANAP tool uses both Uniprot identifiers (e.g. B4G294) and AGI codes (e.g. AT2G40670), and these can be easily interconverted the id mapping function at the Uniprot website.

<http://www.uniprot.org/>

Select the Uniprot accession and TAIR id boxes, add list of identifiers in the large box, and click "map".



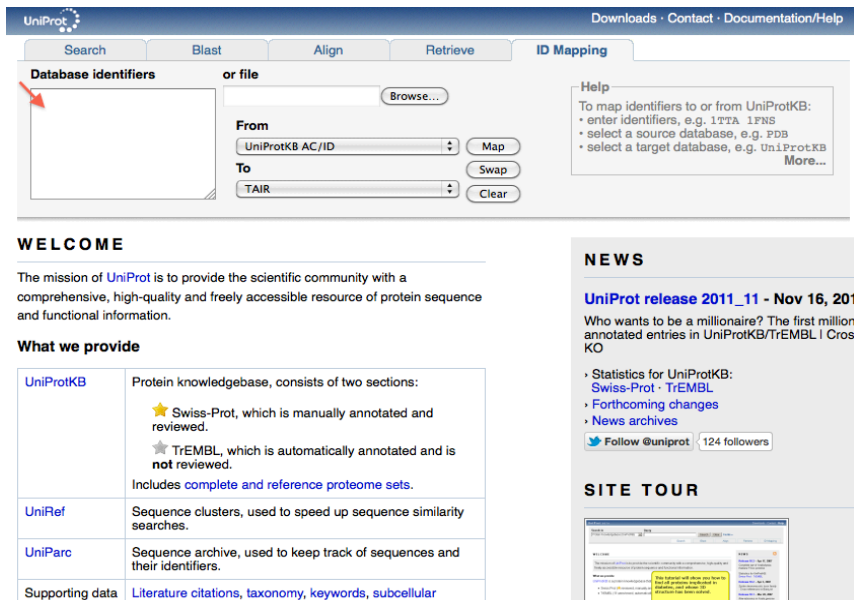

The resulting output will have a list of Uniprot to AGI conversions, highlight and save in either a text file or in excel. This is useful for when you want to create a Cytoscape mapping node attribute file.

Cytoscape offers a very large number of plugins that can be downloaded using the Cytoscape plugin menu (see below).

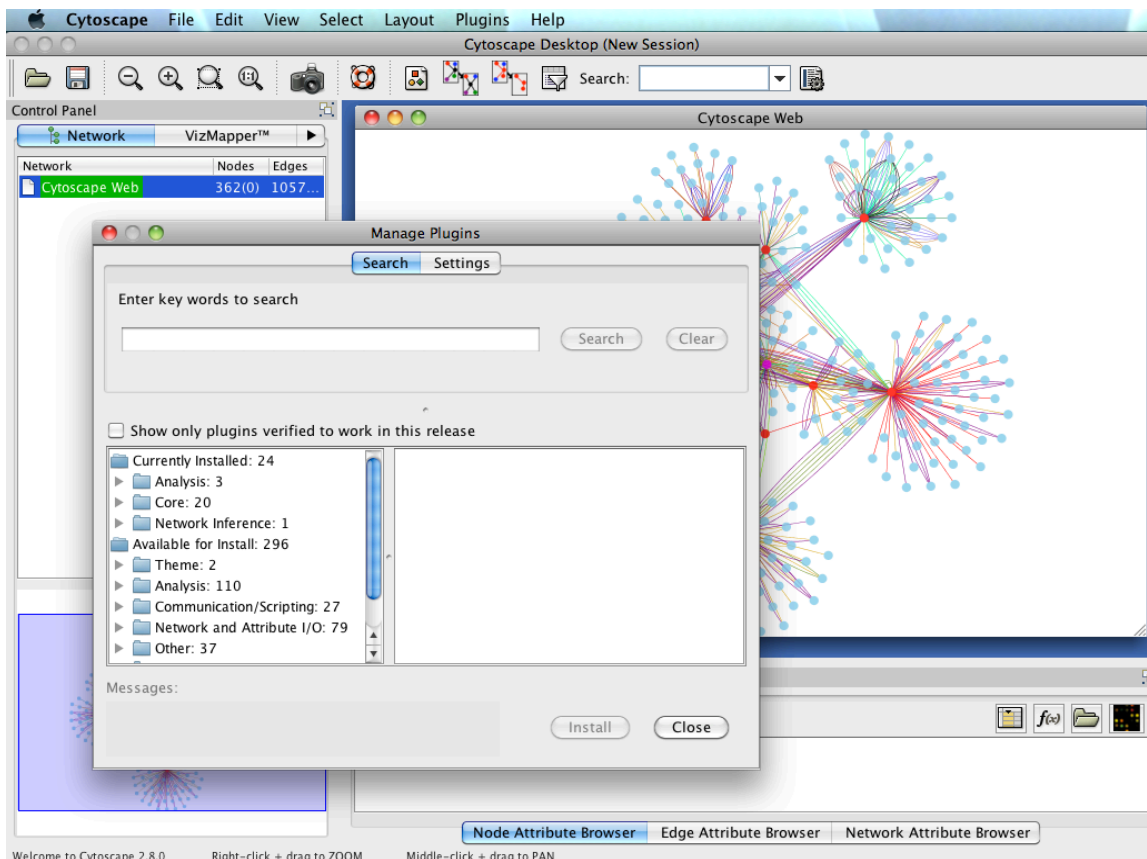

The full Cytoscape tutorial can be found here:

[http://www.cytoscape.org/documentation\\_users.html](http://www.cytoscape.org/documentation_users.html)

You have successfully completed the ANAP user guide.

If you have any questions, queries about the tool or suggestions for added functionality, please email the ANAP developer [Congmao Wang](#) (Zhang lab, Shanghai Jiao Tong University, China) or [Dr. Zoe Wilson](#) (School of Biosciences, University of Nottingham, UK).

Here is a link to videos that explain ANAP's functionality as a step by step process.

[http://gmdd.shgmo.org/Computational-Biology/ANAP/ANAP\\_V1.0/help/help.html](http://gmdd.shgmo.org/Computational-Biology/ANAP/ANAP_V1.0/help/help.html)

---

## 6. References

Cline M.S, Smoot M, Cerami E, Kuchinsky A, Landys N, Workman C, Christmas R, Avila-Campilo I, Creech M, Gross B, Hanspers K, Isserlin R, Kelley R, Killcoyne S, Lotia S, Maere S, Morris J, Ono K, Pavlovic V, Pico A.R, Vailaya A, Wang P.L, Adler A, Conklin B.R, Hood L, Kuiper M, Sander C, Schmulevich I, Schwikowski B, Warner G.J, Ideker T. & Bader G.D. (2007) Integration of biological networks and gene expression data using Cytoscape. *Nature Protocols* 2(10): 2366-2382. [paper](#)

Dortay H, Mehnert N, Burkle L, Schmulling T. & Heyl A. (2006) Analysis of protein interactions within the cytokinin-signaling pathway of *Arabidopsis thaliana*. *FEBS* 273(20): 4631-4644. [paper](#)

Goda H, Sasaki E, Akiyama K, Maruyama-Nakashita A, Nakabayashi K, Li W, Ogawa M, Yamauchi Y, Preston J, Aoki K, Kiba T, Takatsuto S, Fujioka S, Asami T, Nakano T, Kato H, Mizuno T, Sakakibara H, Yamaguchi S, Nambara E, Kamiya Y, Takahashi H, Hirai M.Y, Sakurai T, Shinozaki K, Saito K, Yoshida S. & Shimada Y. (2008) The AtGenExpress hormone and chemical treatment data. *Plant Journal* 55(3): 526-542. [paper](#)

Mudunuri U, Che A, Yi M. & Stephens R.M. (2008) bioDBnet: the biological database network. *Bioinformatics* 25(4): 555-556. [paper](#)
